# Supplementary material for: Efficacy and Safety of Trans-Arterial Yttrium-90 Radioembolization in Patients with Unresectable Liver-Dominant Metastatic or Primary Hepatic Soft Tissue Sarcomas
Source: MDPI journal article supplement (doi:10.3390/cancers14020324), 2022-01-10
Supplement: s1 [file s1]

**Table S1.** Effect of other cancer-directed therapies on radiologic tumor response post-TARE measured by RECIST criteria.

|                                    | Chemotherapy Post-TARE<br>Yes          | Chemotherapy Post-TARE<br>No          | <i>p</i> -value ( $\chi^2$ ) |
|------------------------------------|----------------------------------------|---------------------------------------|------------------------------|
| <b>3 months post-TARE (RECIST)</b> |                                        |                                       |                              |
| DC (CR+PR+SD)                      | 71.4% (15/21)                          | 77.8% (7/9)                           | .71                          |
| ORR (CR+PR)                        | 13.3% (3/21)                           | 56.7% (1/9)                           | .81                          |
| PD                                 | 28.6% (6/21)                           | 22.2% (2/9)                           |                              |
| <b>6 months post-TARE (RECIST)</b> |                                        |                                       |                              |
| DC (CR+PR+SD)                      | 58.8% (10/17)                          | 75.0% (6/8)                           | .43                          |
| ORR (CR+PR)                        | 23.5% (4/17)                           | 12.5% (1/8)                           | .52                          |
| PD                                 | 41.2% (7/17)                           | 25.0% (2/8)                           |                              |
| <b>9 months post-TARE (RECIST)</b> |                                        |                                       |                              |
| DC (CR+PR+SD)                      | 30.8% (4/13)                           | 100.0% (2/2)                          | .06                          |
| ORR (CR+PR)                        | 7.7% (1/13)                            | 50.0% (1/2)                           | .10                          |
| PD                                 | 69.2% (9/13)                           | 0.0% (0/2)                            |                              |
|                                    | Chemotherapy Pre-TARE<br>Yes           | Chemotherapy Pre-TARE<br>No           | <i>p</i> -value ( $\chi^2$ ) |
| <b>3 months post-TARE (RECIST)</b> |                                        |                                       |                              |
| DC (CR+PR+SD)                      | 75.0% (18/24)                          | 66.7% (4/6)                           | .67                          |
| ORR (CR+PR)                        | 16.7% (4/24)                           | 0.0% (0/6)                            | .28                          |
| PD                                 | 25.0% (6/24)                           | 33.3% (2/6)                           |                              |
| <b>6 months post-TARE (RECIST)</b> |                                        |                                       |                              |
| DC (CR+PR+SD)                      | 63.2% (12/19)                          | 66.7% (4/6)                           | .87                          |
| ORR (CR+PR)                        | 21.0% (4/19)                           | 16.7% (1/6)                           | .81                          |
| PD                                 | 36.8% (7/19)                           | 33.3% (2/6)                           |                              |
| <b>9 months post-TARE (RECIST)</b> |                                        |                                       |                              |
| DC (CR+PR+SD)                      | 45.4% (5/11)                           | 25.0% (1/4)                           | .47                          |
| ORR (CR+PR)                        | 18.2% (2/11)                           | 0.0% (0/4)                            | .35                          |
| PD                                 | 54.6% (6/11)                           | 75.0% (3/4)                           |                              |
|                                    | Liver-directed therapy Pre-TARE<br>Yes | Liver-directed therapy Pre-TARE<br>No | <i>p</i> -value ( $\chi^2$ ) |
| <b>3 months post-TARE (RECIST)</b> |                                        |                                       |                              |
| DC (CR+PR+SD)                      | 50.0% (1/2)                            | 75.0% (21/28)                         | .43                          |
| ORR (CR+PR)                        | 0.0% (0/2)                             | 14.3% (4/28)                          | .56                          |
| PD                                 | 50.0% (1/2)                            | 25.0% (7/28)                          |                              |
| <b>6 months post-TARE (RECIST)</b> |                                        |                                       |                              |
| DC (CR+PR+SD)                      | 50.0% (1/2)                            | 65.2% (15/23)                         | .66                          |
| ORR (CR+PR)                        | 0.0% (0/2)                             | 21.7% (5/23)                          | .46                          |
| PD                                 | 50.0% (1/2)                            | 34.8% (8/23)                          |                              |
| <b>9 months post-TARE (RECIST)</b> |                                        |                                       |                              |
| DC (CR+PR+SD)                      | 0.0% (0/3)                             | 50.0% (6/12)                          | .11                          |
| ORR (CR+PR)                        | 0.0% (0/3)                             | 16.7% (2/12)                          | .44                          |
| PD                                 | 100.0% (3/3)                           | 50.0% (6/12)                          |                              |
|                                    | Liver Surgery Pre-TARE<br>Yes          | Liver Surgery Pre-TARE<br>No          | <i>p</i> -value ( $\chi^2$ ) |
| <b>3 months post-TARE (RECIST)</b> |                                        |                                       |                              |

|                                    |                              |                              |                                             |
|------------------------------------|------------------------------|------------------------------|---------------------------------------------|
| DC (CR+PR+SD)                      | 50.0% (4/8)                  | 81.8% (18/22)                | .08                                         |
| ORR (CR+PR)                        | 0.0% (0/8)                   | 18.2% (4/22)                 | .19                                         |
| PD                                 | 50.0% (4/8)                  | 18.2% (4/22)                 |                                             |
| <b>6 months post-TARE (RECIST)</b> |                              |                              |                                             |
| DC (CR+PR+SD)                      | 55.6% (5/9)                  | 68.8% (11/16)                | .50                                         |
| ORR (CR+PR)                        | 11.1% (1/9)                  | 25.0% (4/16)                 | .40                                         |
| PD                                 | 44.4% (4/9)                  | 31.2% (5/16)                 |                                             |
| <b>9 months post-TARE (RECIST)</b> |                              |                              |                                             |
| DC (CR+PR+SD)                      | 40.0% (2/5)                  | 40.0% (4/10)                 | >0.9                                        |
| ORR (CR+PR)                        | 0.0% (0/5)                   | 20.0% (2/10)                 | .28                                         |
| PD                                 | 60.0% (3/5)                  | 60.0% (6/10)                 |                                             |
|                                    | <b>Radiotherapy Pre-TARE</b> | <b>Radiotherapy Pre-TARE</b> | <b><i>p</i>-value (<math>\chi^2</math>)</b> |
|                                    | <b>Yes</b>                   | <b>No</b>                    |                                             |
| <b>3 months post-TARE (RECIST)</b> |                              |                              |                                             |
| DC (CR+PR+SD)                      | 78.6% (11/14)                | 68.8% (11/16)                | .54                                         |
| ORR (CR+PR)                        | 21.4% (3/14)                 | 6.2% (1/16)                  | .22                                         |
| PD                                 | 21.4% (3/14)                 | 31.2% (5/16)                 |                                             |
| <b>6 months post-TARE (RECIST)</b> |                              |                              |                                             |
| DC (CR+PR+SD)                      | 70.0% (7/10)                 | 60.0% (9/15)                 | .60                                         |
| ORR (CR+PR)                        | 20.0% (2/10)                 | 20.0% (3/15)                 | >0.9                                        |
| PD                                 | 30.0% (3/10)                 | 40.0% (6/15)                 |                                             |
| <b>9 months post-TARE (RECIST)</b> |                              |                              |                                             |
| DC (CR+PR+SD)                      | 33.3% (2/6)                  | 44.4% (4/9)                  | .66                                         |
| ORR (CR+PR)                        | 16.7% (1/6)                  | 11.1% (1/9)                  | .75                                         |
| PD                                 | 66.7% (4/6)                  | 55.6% (5/9)                  |                                             |

TARE, trans-arterial radioembolization; RECIST, Response Evaluation Criteria in Solid Tumors; DC, disease control; CR, complete response; PR, partial response; SD, stable disease; PD, disease progression; ORR, objective response rate; ( $\chi^2$ ), Chi-Square Test.

**Table S2.** Effect of other cancer-directed therapies on radiologic tumor response post-TARE measured by mRECIST criteria.

|                                     | Chemotherapy Post-TARE<br>Yes          | Chemotherapy Post-TARE<br>No          | <i>p</i> -value ( $\chi^2$ ) |
|-------------------------------------|----------------------------------------|---------------------------------------|------------------------------|
| <b>3 months post-TARE (mRECIST)</b> |                                        |                                       |                              |
| DC (CR+PR+SD)                       | 80.9% (17/21)                          | 77.8% (7/9)                           | .84                          |
| ORR (CR+PR)                         | 57.1% (12/21)                          | 55.6% (5/9)                           | .94                          |
| PD                                  | 19.1% (4/21)                           | 22.2% (2/9)                           |                              |
| <b>6 months post-TARE (mRECIST)</b> |                                        |                                       |                              |
| DC (CR+PR+SD)                       | 64.7% (11/17)                          | 75.0% (6/8)                           | .60                          |
| ORR (CR+PR)                         | 52.9% (9/17)                           | 50.0% (4/8)                           | .89                          |
| PD                                  | 35.3% (6/17)                           | 25.0% (2/8)                           |                              |
| <b>9 months post-TARE (mRECIST)</b> |                                        |                                       |                              |
| DC (CR+PR+SD)                       | 38.5% (5/13)                           | 100.0% (2/2)                          | .10                          |
| ORR (CR+PR)                         | 30.8% (4/13)                           | 100.0% (2/2)                          | .06                          |
| PD                                  | 61.5% (8/13)                           | 0.0% (0/2)                            |                              |
|                                     | Chemotherapy Pre-TARE<br>Yes           | Chemotherapy Pre-TARE<br>No           | <i>p</i> -value ( $\chi^2$ ) |
| <b>3 months post-TARE (mRECIST)</b> |                                        |                                       |                              |
| DC (CR+PR+SD)                       | 83.3% (20/24)                          | 66.7% (4/6)                           | .36                          |
| ORR (CR+PR)                         | 54.2% (13/24)                          | 66.7% (4/6)                           | .58                          |
| PD                                  | 16.7% (4/24)                           | 33.3% (2/6)                           |                              |
| <b>6 months post-TARE (mRECIST)</b> |                                        |                                       |                              |
| DC (CR+PR+SD)                       | 68.4% (13/19)                          | 66.7% (4/6)                           | .93                          |
| ORR (CR+PR)                         | 47.4% (9/19)                           | 66.7% (4/6)                           | .40                          |
| PD                                  | 31.6% (6/19)                           | 33.3% (2/6)                           |                              |
| <b>9 months post-TARE (mRECIST)</b> |                                        |                                       |                              |
| DC (CR+PR+SD)                       | 55.6% (6/11)                           | 25.0% (1/4)                           | .31                          |
| ORR (CR+PR)                         | 45.4% (5/11)                           | 25.0% (1/4)                           | .47                          |
| PD                                  | 45.4% (5/11)                           | 75.0% (3/4)                           |                              |
|                                     | Liver-directed therapy Pre-TARE<br>Yes | Liver-directed therapy Pre-TARE<br>No | <i>p</i> -value ( $\chi^2$ ) |
| <b>3 months post-TARE (mRECIST)</b> |                                        |                                       |                              |
| DC (CR+PR+SD)                       | 50.0% (1/2)                            | 82.1% (23/28)                         | .27                          |
| ORR (CR+PR)                         | 50.0% (1/2)                            | 57.1% (16/28)                         | .84                          |
| PD                                  | 50.0% (1/2)                            | 17.9% (5/28)                          |                              |
| <b>6 months post-TARE (mRECIST)</b> |                                        |                                       |                              |
| DC (CR+PR+SD)                       | 50.0% (1/2)                            | 69.6% (16/23)                         | .56                          |
| ORR (CR+PR)                         | 50.0% (1/2)                            | 52.2% (12/23)                         | .95                          |
| PD                                  | 50.0% (1/2)                            | 30.4% (7/23)                          |                              |
| <b>9 months post-TARE (mRECIST)</b> |                                        |                                       |                              |
| DC (CR+PR+SD)                       | 0.0% (0/3)                             | 58.3% (7/12)                          | .07                          |
| ORR (CR+PR)                         | 0.0% (0/3)                             | 50.0% (6/12)                          | .11                          |
| PD                                  | 100.0% (3/3)                           | 41.7% (5/12)                          |                              |
|                                     | Liver Surgery Pre-TARE<br>Yes          | Liver Surgery Pre-TARE<br>No          | <i>p</i> -value ( $\chi^2$ ) |
| <b>3 months post-TARE (mRECIST)</b> |                                        |                                       |                              |
| DC (CR+PR+SD)                       | 50.0% (4/8)                            | 90.9% (20/22)                         | .01                          |

|                                     |                              |                              |                                             |
|-------------------------------------|------------------------------|------------------------------|---------------------------------------------|
| ORR (CR+PR)                         | 50.0% (4/8)                  | 59.1% (13/22)                | .65                                         |
| PD                                  | 50.0% (4/8)                  | 9.1% (2/22)                  |                                             |
| <b>6 months post-TARE (mRECIST)</b> |                              |                              |                                             |
| DC (CR+PR+SD)                       | 55.6% (5/9)                  | 75.0% (12/16)                | .31                                         |
| ORR (CR+PR)                         | 44.4% (4/9)                  | 56.2% (9/16)                 | .57                                         |
| PD                                  | 44.4% (4/9)                  | 25.0% (4/16)                 |                                             |
| <b>9 months post-TARE (mRECIST)</b> |                              |                              |                                             |
| DC (CR+PR+SD)                       | 40.0% (2/5)                  | 50.0% (5/10)                 | .71                                         |
| ORR (CR+PR)                         | 40.0% (2/5)                  | 40.0% (4/10)                 | >0.9                                        |
| PD                                  | 60.0% (3/5)                  | 50.0% (5/10)                 |                                             |
|                                     | <b>Radiotherapy Pre-TARE</b> | <b>Radiotherapy Pre-TARE</b> | <b><i>p</i>-value (<math>\chi^2</math>)</b> |
|                                     | <b>Yes</b>                   | <b>No</b>                    |                                             |
| <b>3 months post-TARE (mRECIST)</b> |                              |                              |                                             |
| DC (CR+PR+SD)                       | 85.7% (12/14)                | 75.0% (12/16)                | .46                                         |
| ORR (CR+PR)                         | 64.3% (9/14)                 | 50.0% (8/16)                 | .43                                         |
| PD                                  | 14.3% (2/14)                 | 25.0% (4/16)                 |                                             |
| <b>6 months post-TARE (mRECIST)</b> |                              |                              |                                             |
| DC (CR+PR+SD)                       | 70.0% (7/10)                 | 66.7% (10/15)                | .86                                         |
| ORR (CR+PR)                         | 60.0% (6/10)                 | 46.7% (7/15)                 | .51                                         |
| PD                                  | 30.0% (3/10)                 | 33.3% (5/15)                 |                                             |
| <b>9 months post-TARE (mRECIST)</b> |                              |                              |                                             |
| DC (CR+PR+SD)                       | 33.3% (2/6)                  | 55.6% (5/9)                  | .39                                         |
| ORR (CR+PR)                         | 33.3% (2/6)                  | 44.4% (4/9)                  | .66                                         |
| PD                                  | 66.7% (4/6)                  | 44.4% (4/9)                  |                                             |

TARE, trans-arterial radioembolization; mRECIST, Modified Response Evaluation Criteria in Solid Tumors; DC, disease control; CR, complete response; PR, partial response; SD, stable disease; PD, disease progression; ORR, objective response rate; ( $\chi^2$ ), Chi-Square Test.

**Table S3.** Univariate Analysis of Overall Survival after TARE based on mRECIST response at 3-, 6- and 9-months post-procedure.

|                                  | Number (%) | <u>Kaplan Meier</u><br>Median OS (months, 95%CI) | <i>p</i> -Value<br>(Log-rank) | <u>Cox Proportional Hazards</u><br>Hazard Ration (95%CI) | <i>p</i> -Value<br>(Cox) |
|----------------------------------|------------|--------------------------------------------------|-------------------------------|----------------------------------------------------------|--------------------------|
| <b>mRECIST response 3-months</b> |            |                                                  |                               |                                                          |                          |
| DC                               | 24 (68.6%) | 22(10.9–33.0)                                    | .089                          | 0.44(0.17–1.2)                                           | .104                     |
| PD                               | 6 (17.1%)  | 10(0.0–22.0)                                     |                               |                                                          |                          |
| <b>mRECIST response 6-months</b> |            |                                                  |                               |                                                          |                          |
| DC                               | 17 (48.6%) | 40(17.8–62.2)                                    | <b>.003</b>                   | 0.23(0.08–0.68)                                          | <b>.008</b>              |
| PD                               | 8 (22.8%)  | 16(6.3–25.7)                                     |                               |                                                          |                          |
| <b>mRECIST response 9-months</b> |            |                                                  |                               |                                                          |                          |
| DC                               | 8 (22.8%)  | 94(5.2–182.8)                                    | .125                          | 0.29(0.05–1.5)                                           | .146                     |
| PD                               | 7 (20.0%)  | 33(14.9–51.0)                                    |                               |                                                          |                          |

TARE, trans-arterial radioembolization; mRECIST, Modified Response Evaluation Criteria in Solid Tumors; DC, disease control; PD, disease progression; 95%CI, 95% Confidence Interval; OS, overall survival.
